# Supplementary material for: A cost-effective, stable, magnetically recyclable photocatalyst of ultra-high organic pollutant degradation efficiency: SnFe2O4 nanocrystals from a carrier solvent assisted interfacial reaction process
Source: Royal Society of Chemistry journal article supplement (doi:10.1039/c5ta02278a), 2015-01-01
Supplement: c5ta02278a1.pdf [file c5ta02278a1.pdf]

## Supporting information

### **A cost-effective, stable, magnetically recyclable photocatalyst of ultra-high organic pollutant degradation efficiency: $\text{SnFe}_2\text{O}_4$ nanocrystals from a carrier solvent assisted interfacial reaction process**

*Kuan-Ting Lee and Shih-Yuan Lu\**

Department of Chemical Engineering, National Tsing Hua University, Hsinchu 30013,  
Taiwan

\*Email : [SYLu@mx.nthu.edu.tw](mailto:SYLu@mx.nthu.edu.tw)

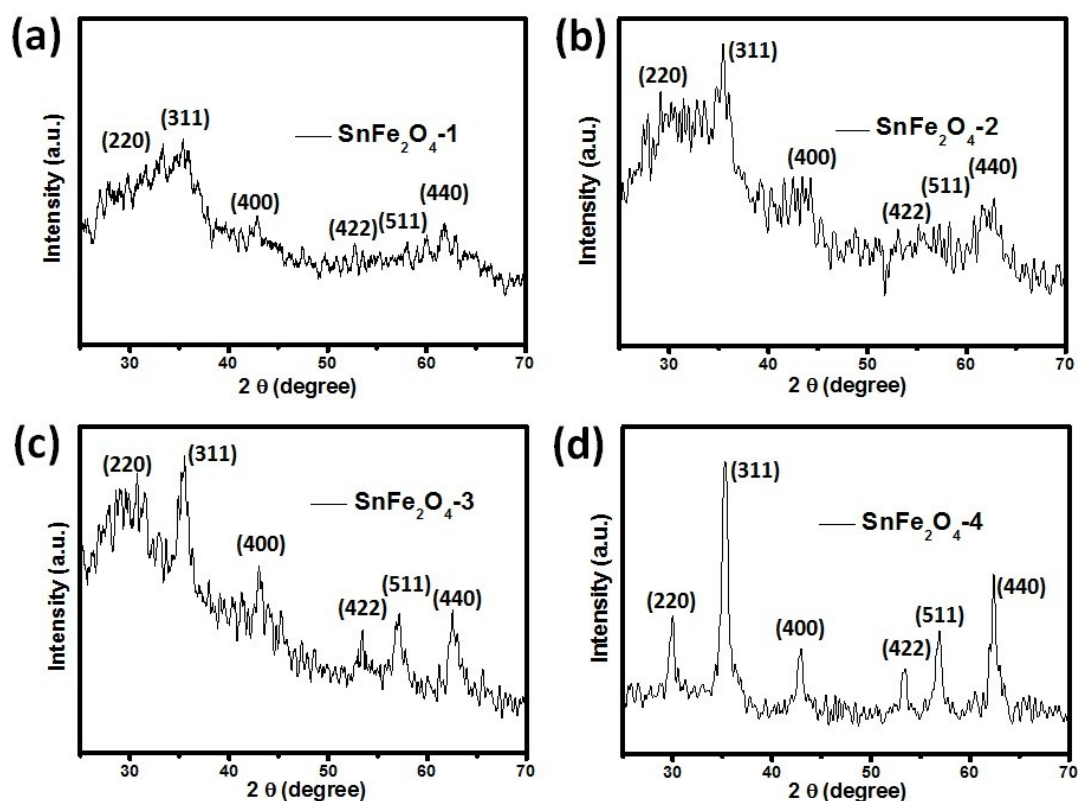

**Fig. S1.** XRD patterns of samples  $\text{SnFe}_2\text{O}_4$ -1 to  $\text{SnFe}_2\text{O}_4$ -4.

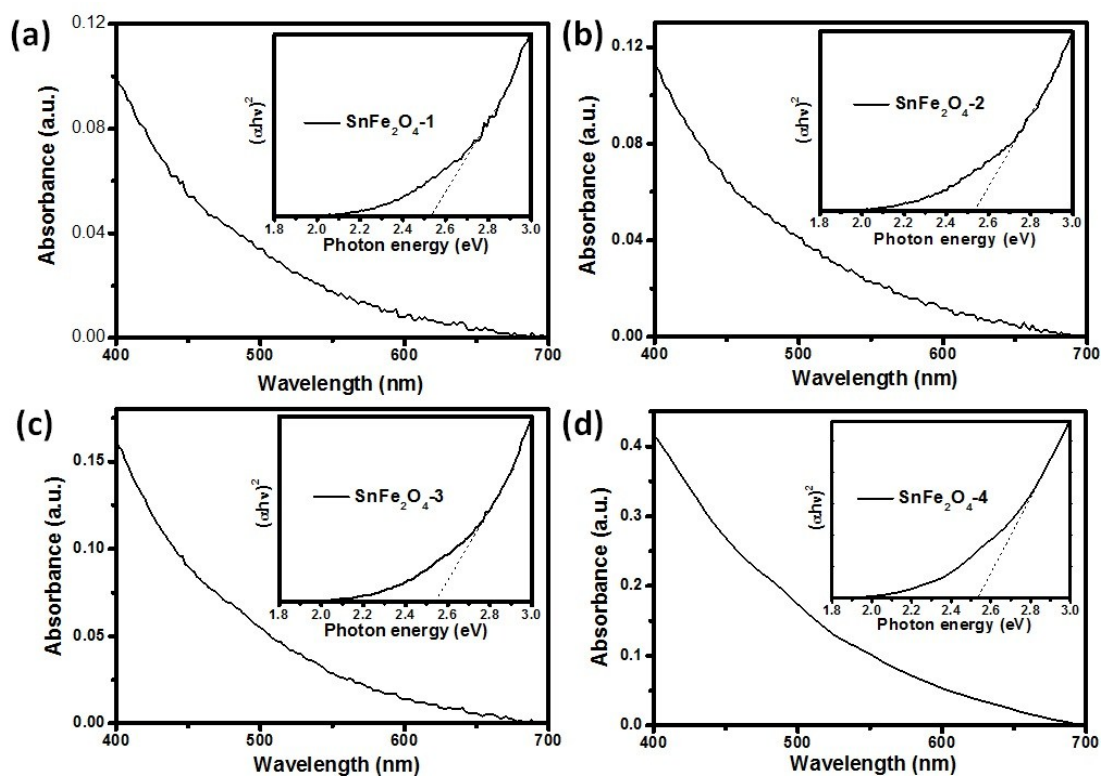

**Fig. S2.** UV-visible spectrum of samples  $\text{SnFe}_2\text{O}_4$ -1 to  $\text{SnFe}_2\text{O}_4$ -4. Inset shows  $(\alpha h\nu)^2$  vs. photon energy plot for bandgap determination.

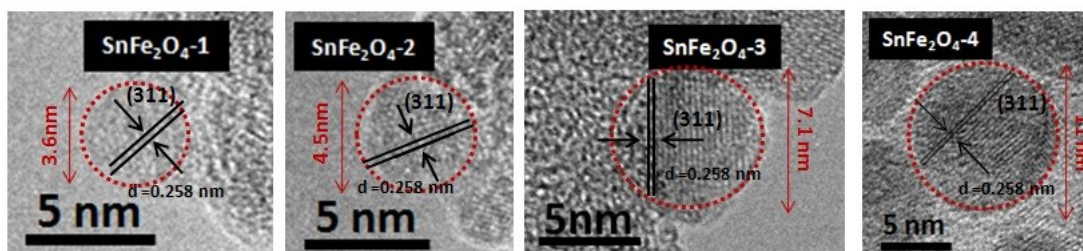

**Fig. S3.** HRTEM images of samples  $\text{SnFe}_2\text{O}_4$ -1 to  $\text{SnFe}_2\text{O}_4$ -4.

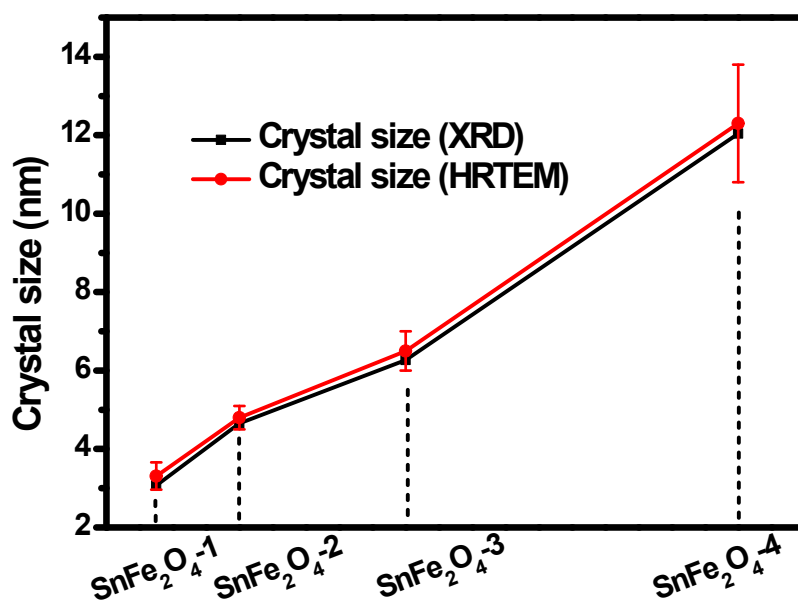

Fig. S4. Comparison of nanocrystal sizes for all four SnFe<sub>2</sub>O<sub>4</sub> samples, as determined from XRD patterns and HRTEM images.

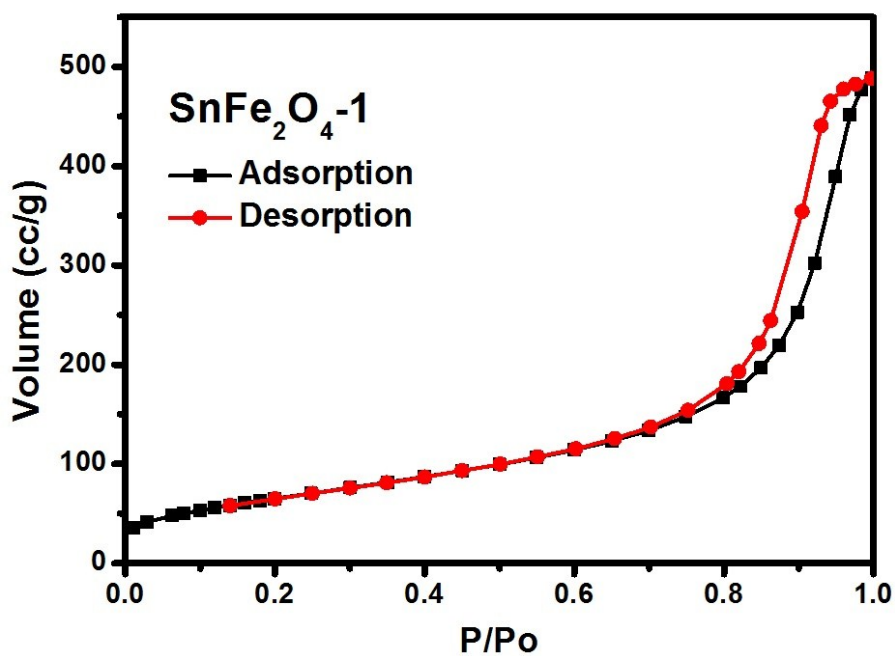

Fig. S5. N<sub>2</sub> adsorption/desorption isotherms of sample SnFe<sub>2</sub>O<sub>4</sub>-1.

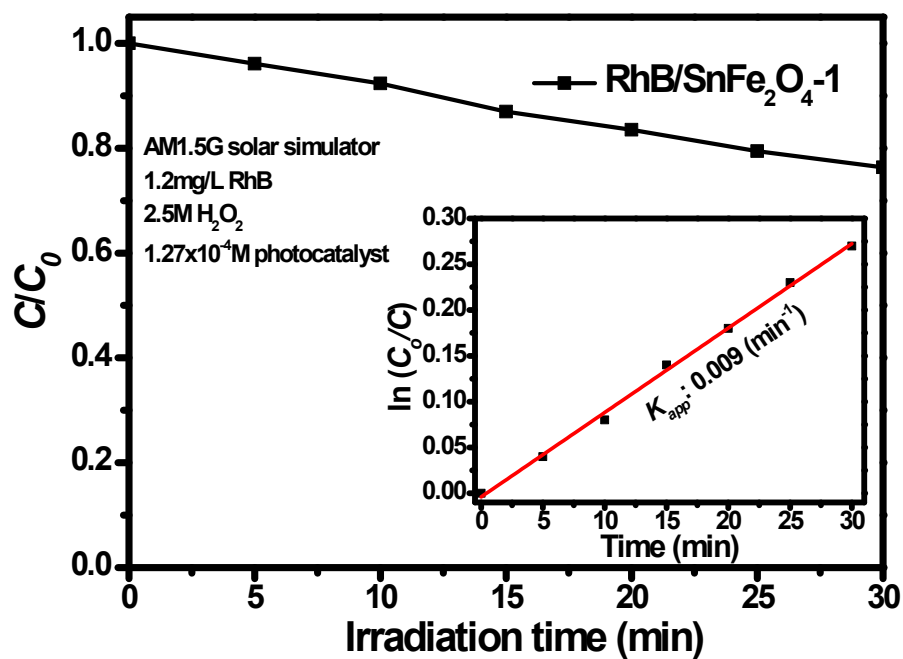

**Fig. S6.**  $C/C_0$  versus time curve for RhB solution containing sample  $\text{SnFe}_2\text{O}_4-1$  without  $\text{H}_2\text{O}_2$  addition. Inset shows determination of  $K_{app}$ .

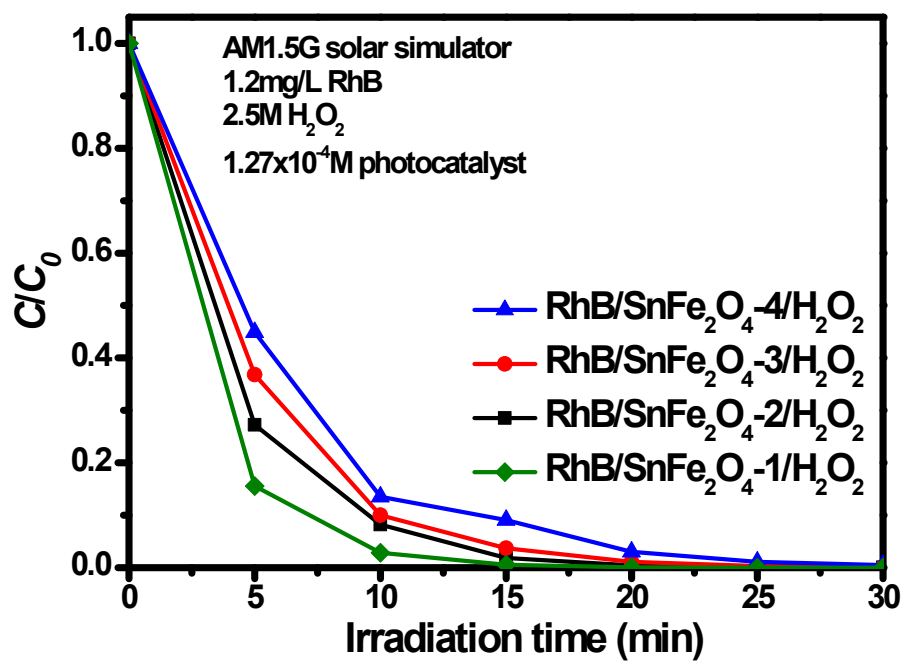

**Fig. S7.**  $C/C_0$  versus time curves for RhB solution containing samples  $\text{SnFe}_2\text{O}_4$ -1 to  $\text{SnFe}_2\text{O}_4$ -4 with  $\text{H}_2\text{O}_2$  addition.

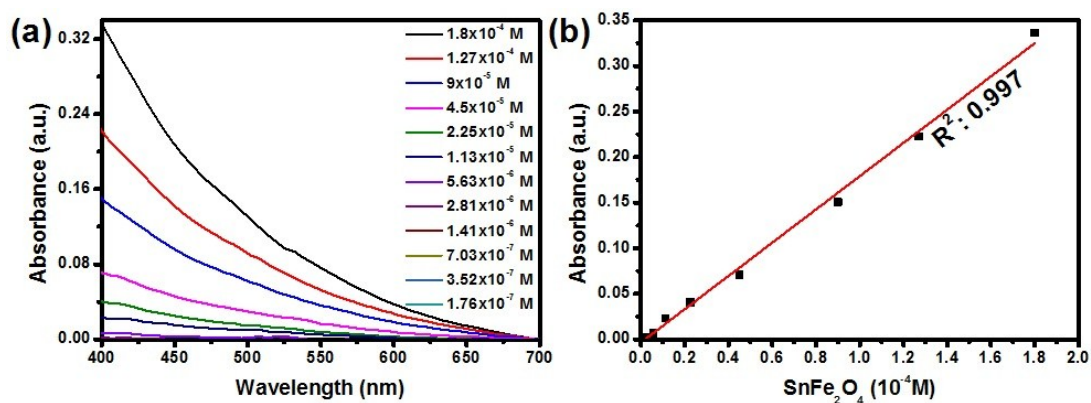

**Fig. S8.** (a) Absorption spectra of sample  $\text{SnFe}_2\text{O}_4$ -1 suspensions at selected concentrations, (b) correlation curve of absorbance of  $\text{SnFe}_2\text{O}_4$  suspension at 400 nm vs.  $\text{SnFe}_2\text{O}_4$  concentration.

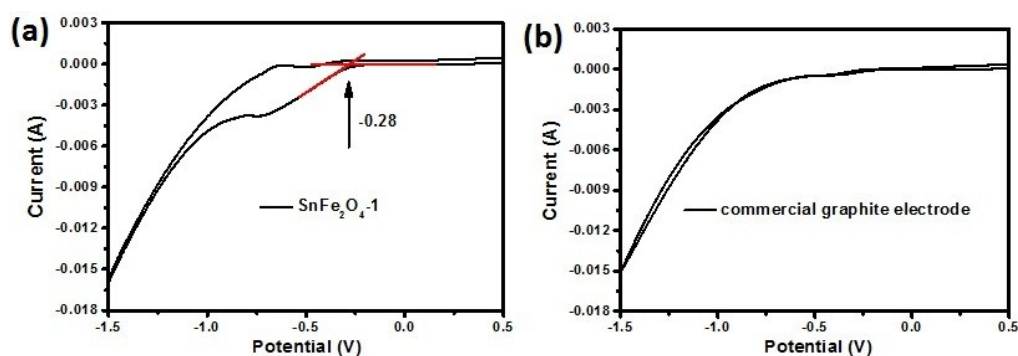

**Fig. S9.** Cycling voltammograms recorded for (a) sample  $\text{SnFe}_2\text{O}_4$ -1, (b) commercial graphite electrode.

**Table S1** Atomic ratios of Fe vs. Sn of samples SnFe<sub>2</sub>O<sub>4</sub>-1 to SnFe<sub>2</sub>O<sub>4</sub>-4.

| Photocatalyst                       | Fe / Sn (atomic ratio) |
|-------------------------------------|------------------------|
| SnFe <sub>2</sub> O <sub>4</sub> -1 | 2.08                   |
| SnFe <sub>2</sub> O <sub>4</sub> -2 | 2.19                   |
| SnFe <sub>2</sub> O <sub>4</sub> -3 | 2.03                   |
| SnFe <sub>2</sub> O <sub>4</sub> -4 | 2.34                   |

**Table S2** Grain sizes and coercivities of samples SnFe<sub>2</sub>O<sub>4</sub>-1 to SnFe<sub>2</sub>O<sub>4</sub>-4.

| Photocatalyst                       | Grain size (nm) | Coercivity (Oe) |
|-------------------------------------|-----------------|-----------------|
| SnFe <sub>2</sub> O <sub>4</sub> -1 | 3.1             | 7.5             |
| SnFe <sub>2</sub> O <sub>4</sub> -2 | 4.7             | 10              |
| SnFe <sub>2</sub> O <sub>4</sub> -3 | 6.3             | 22              |
| SnFe <sub>2</sub> O <sub>4</sub> -4 | 12.0            | 4.0             |

**Table S3** Compilation of apparent reaction rate constants for RhB degradation in Fenton-like processes.

| Reference        | Type of catalyst                 | Source of light                                     | Concentration of RhB (mg/L) | Concentration of catalyst(M) | Apparent reaction rate constant; $K_{app}$ (min <sup>-1</sup> ) |
|------------------|----------------------------------|-----------------------------------------------------|-----------------------------|------------------------------|-----------------------------------------------------------------|
| [S1]             | BiVO <sub>4</sub>                | 350W Xe lamp, simulated sunlight                    | 9.58                        | 3.09×10 <sup>-3</sup>        | 0.098                                                           |
| <b>This work</b> | SnFe <sub>2</sub> O <sub>4</sub> | 150W Xe lamp, simulated sunlight                    | 10                          | 1.27×10 <sup>-4</sup>        | 0.13                                                            |
| [S2]             | BiFeO <sub>3</sub>               | 500 W Halogen lamp with a cutoff filter ( > 420 nm) | 4.79                        | 1.6×10 <sup>-3</sup>         | 0.056                                                           |
| [S3]             | g-C <sub>3</sub> N <sub>4</sub>  | 500 W Halogen lamp with a cutoff filter ( > 420 nm) | 4.79                        | 0.5 (g/L)                    | 0.044                                                           |

|                  |                                                  |                                                                   |      |                       |            |
|------------------|--------------------------------------------------|-------------------------------------------------------------------|------|-----------------------|------------|
| [S4]             | EuFeO <sub>3</sub>                               | 500 W Xe lamp with a cutoff filter (> 420 nm)                     | 5    | 3.9×10 <sup>-3</sup>  | 0.002      |
| [S5]             | Bi <sub>2</sub> WO <sub>6</sub> /Cu <sup>0</sup> | 500 W Xe lamp with a cutoff filter (> 420 nm)                     | 4.79 | 1.4×10 <sup>-3</sup>  | 0.03       |
| <b>This work</b> | SnFe <sub>2</sub> O <sub>4</sub>                 | 150W Xe lamp, simulated sunlight /with a cutoff filter (> 422 nm) | 5    | 1.27×10 <sup>-4</sup> | 0.21/ 0.15 |

**Table S4.** Band structure parameters of SnFe<sub>2</sub>O<sub>4</sub> NCs.

| sample                              | $E_{\text{red}}$ (V) | LUMO <sup>a</sup> (eV) | HOMO <sup>b</sup> (eV) | $\lambda_{\text{abs}}$ <sup>c</sup> (nm) | $E_{\text{g}}$ <sup>d</sup> (eV) |
|-------------------------------------|----------------------|------------------------|------------------------|------------------------------------------|----------------------------------|
| SnFe <sub>2</sub> O <sub>4</sub> -1 | -0.28                | -4.43                  | -6.96                  | 505                                      | 2.53                             |

<sup>a</sup>Determined by Eq. (1). <sup>b</sup>Determined from LUMO and band gap energy. <sup>c</sup>Measured by UV–visible absorption spectrum. <sup>d</sup>Estimated from UV–visible absorption spectrum.

### Experimental determination of conduction band position of SnFe<sub>2</sub>O<sub>4</sub> NCs:

Here, we determine the conduction band position of SnFe<sub>2</sub>O<sub>4</sub> NCs with cyclic voltammetry analyses. The working electrode was prepared by drop-casting ethanolic suspension of SnFe<sub>2</sub>O<sub>4</sub> NCs onto a graphite electrode followed by drying at 60 °C. The counter electrode was Pt coil, and Ag/AgCl served as the reference electrode. The cyclic voltammograms were recorded in an electrolyte of 0.1 M Na<sub>2</sub>SO<sub>4</sub>(aq) with a negative scan starting from 0.5 to −1.5 V and then back to 0.5 V at a scan rate of 30 mV/s. The LUMO energy ( $E_{\text{LUMO}}$ ) of electroactive materials can be estimated from the onset reduction potential ( $E_{\text{red}}$ ), according to the following equation<sup>[S6,S7]</sup>

$$E_{\text{LUMO}} = -(E_{\text{red}} + 4.71) \text{ eV} \quad (1)$$

Here, the onset potential is referenced to the Ag/AgCl electrode. The value of 4.71 represents the difference between the vacuum level potential of the normal hydrogen electrode (NHE) and the potential of the Ag/AgCl electrode versus NHE.<sup>[S8,S9]</sup> We started from 0.5 V and proceeded with a negative potential scan from 0.5 to −1.5 V and then back to 0.5 V. The onset reduction potentials of sample SnFe<sub>2</sub>O<sub>4</sub>-1 was thus determined to be −0.28 V as shown in Fig. S9(a). A commercial graphite electrode

was taken as a control, and no reduction peak can be identified under the same testing condition, as shown in Fig. S9(b). The results of relevant band structure data were summarized in Table S4.

## References:

- [S1]. M. Ge, L. Liu, W. Chen, Z. Zhou, *CrystEngComm*, 2012, **14**, 1038-1044.
- [S2]. J. An, L. Zhu, Y. Zhang, H. Tang, *Journal of Environmental Sciences*, 2013, **25**, 1213-1225.
- [S3]. Y. Cui, Z. Ding, P. Liu, M. Antonietti, X. Fu, X. Wang, *Phys. Chem. Chem. Phys.*, 2012, **14**, 1455-1462.
- [S4]. L. Ju, Z. Chen, L. Fang, W. Dong, F. Zheng, M. Shen, *J. Am. Ceram. Soc.*, 2011, **94**, 3418-3424.
- [S5]. J. Xu, W. Wang, E. Gao, J. Ren, L. Wang, *Catalysis Communications*, 2011, **12**, 834-838.
- [S6] K. G. Deepa, J. Nagaraju, *Mater. Sci. Eng. B*, 2012, **177**, 1023-1028.
- [S7] K. T. Lee,, S. Y. Lu, *J. Phys. Chem. C*, 2014, **118**, 14457-14463.
- [S8] C. Karunakaran, J. Jayabharathi, K. Jayamoorthy, K. B. Devi, *Sens. Actuators B*, 2012, **168**, 263-270.
- [S9] S. H. Chang, M. Y. Chiang, C. C. Chiang, F. W. Yuan, C. Y. Chen, B. C. Chiu, T. L. Kao, C. H. Lai, H. Y. Tuan, *Energy Environ. Sci.* 2011, **4**, 4929-4932.
